# Supplementary material
Source: Research Square preprint supplement (doi:10.21203/rs.3.rs-10361235/v1)

**Graphical Abstract**

**
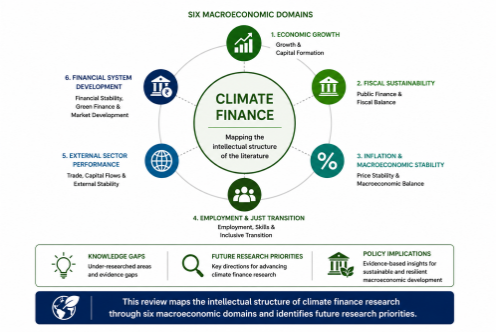
**

Supplement: Supplementary file 1 [file b9caa16d57ec659544b7eda1.docx]
